# Supplementary material
Source: MDPI journal article supplement (https://www.mdpi.com/search?q=molecules-25-05536)

# Synthesis and Properties of Pentafluorosulfanyl Group (SF<sub>5</sub>)-Containing meta-Diamide Insecticides

Jae Gon Kim <sup>1</sup>, On-Yu Kang <sup>1,2</sup>, Sang Mee Kim <sup>1</sup>, Guldana Issabayeva <sup>1,3</sup>, In Seok Oh <sup>1,4</sup>, Yaeji Lee <sup>1,3</sup>, Won Hyung Lee <sup>5</sup>, Hwan Jung Lim <sup>1,3,\*</sup> and Seong Jun Park <sup>1,\*</sup>

<sup>1</sup> Bio & Drug Discovery Division, Korea Research Institute of Chemical Technology (KRICT), 141 Gajeong-ro, Yuseong-gu, Daejeon 34114, Korea; jgkim@kRICT.re.kr (J.G.K.); dhdb0901@kRICT.re.kr (O.-Y.K.); smk95@kRICT.re.kr (S.M.K.); guldana@kRICT.re.kr (G.I.); ois0821@kRICT.re.kr (I.S.O.); leeyj@kRICT.re.kr (Y.L.)

<sup>2</sup> Department of Chemistry, Sungkyunkwan University, Suwon 16419, Korea

<sup>3</sup> Department of Medicinal and Pharmaceutical Chemistry, University of Science & Technology, Daejeon 34113, Korea

<sup>4</sup> Department of Chemistry, Sogang University, Seoul 04107, Korea

<sup>5</sup> Central Research Institute, Kyung Nong Co. Ltd., 34-14 Summeori-gil, Kyongju 38175, Korea; whlee1@dongoh.co.kr

\* Correspondence: indium@kRICT.re.kr (H.J.L.); sjunpark@kRICT.re.kr (S.J.P.); Tel.: +82-42-860-7177 (H.J.L.); +82-42-860-7175 (S.J.P.)

Academic Editors: György Szöllösi and Eva Frank

Received: 21 October 2020; Accepted: 23 November 2020; Published: 25 November 2020

## Supporting information (Supplementary Data)

### Contents

|                                                                                                  |    |
|--------------------------------------------------------------------------------------------------|----|
| Result & data                                                                                    |    |
| <sup>1</sup> H, <sup>13</sup> C and <sup>19</sup> F NMR spectroscopy of <b>1c</b> .....          | 2  |
| <sup>1</sup> H, <sup>13</sup> C and <sup>19</sup> F NMR spectroscopy of <b>1d</b> .....          | 4  |
| <sup>1</sup> H, <sup>13</sup> C and <sup>19</sup> F NMR spectroscopy of <b>3</b> .....           | 6  |
| <sup>1</sup> H, <sup>13</sup> C and <sup>19</sup> F NMR spectroscopy of <b>4a</b> .....          | 8  |
| <sup>1</sup> H, <sup>13</sup> C and <sup>19</sup> F NMR spectroscopy of <b>4b</b> .....          | 10 |
| <sup>1</sup> H, <sup>13</sup> C and <sup>19</sup> F NMR spectroscopy of <b>4c</b> .....          | 12 |
| <sup>1</sup> H, <sup>13</sup> C and <sup>19</sup> F NMR spectroscopy of <b>4d</b> .....          | 14 |
| <b>Table S1 and S2: Larvicidal activity against <i>Plutella xylostella</i> (4c and 4d)</b> ..... | 16 |
| <b>Figure S1: pH-metric Log P of compounds <b>4d</b> (KI-03066)</b> .....                        | 20 |
| <b>Figure S2: pH-metric Log P of Broflanilide</b> .....                                          | 23 |
| <b>Figure S3: Ion Channels assay of <b>4d</b> (KI-03066) and Broflanilide</b> .....              | 24 |

**$^1\text{H}$ ,  $^{13}\text{C}$  and  $^{19}\text{F}$  NMR spectroscopy of 1c.**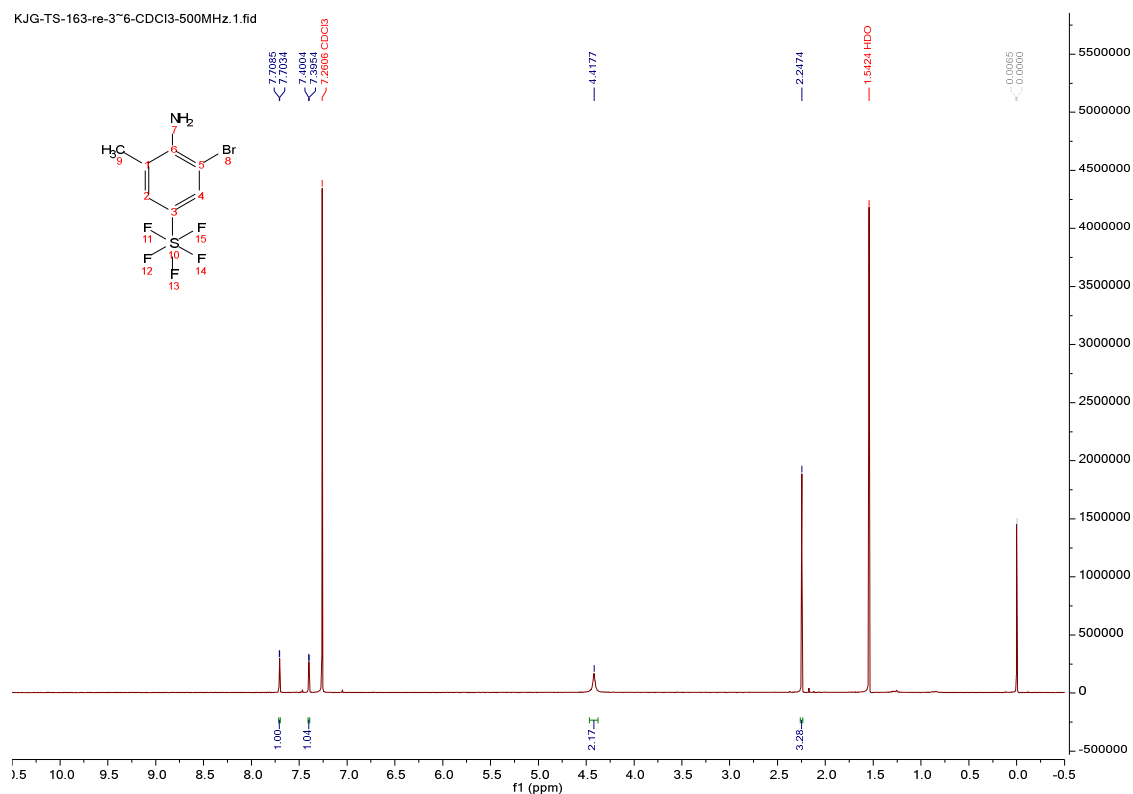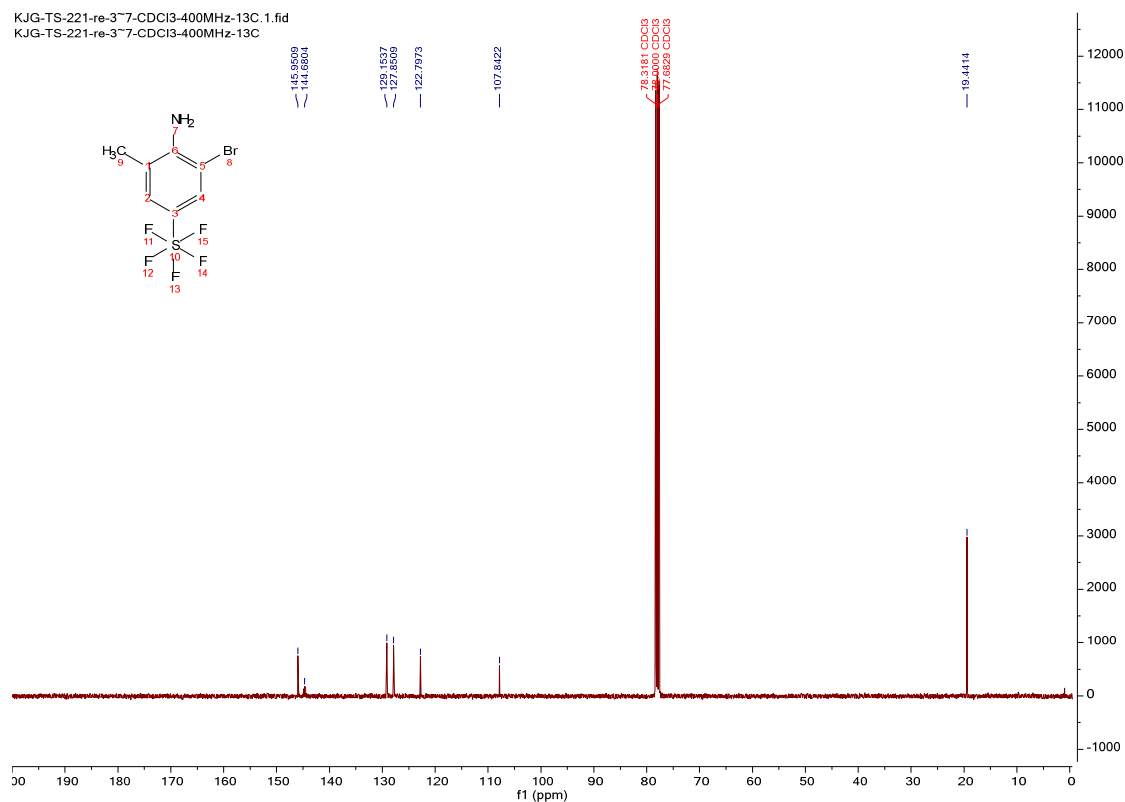

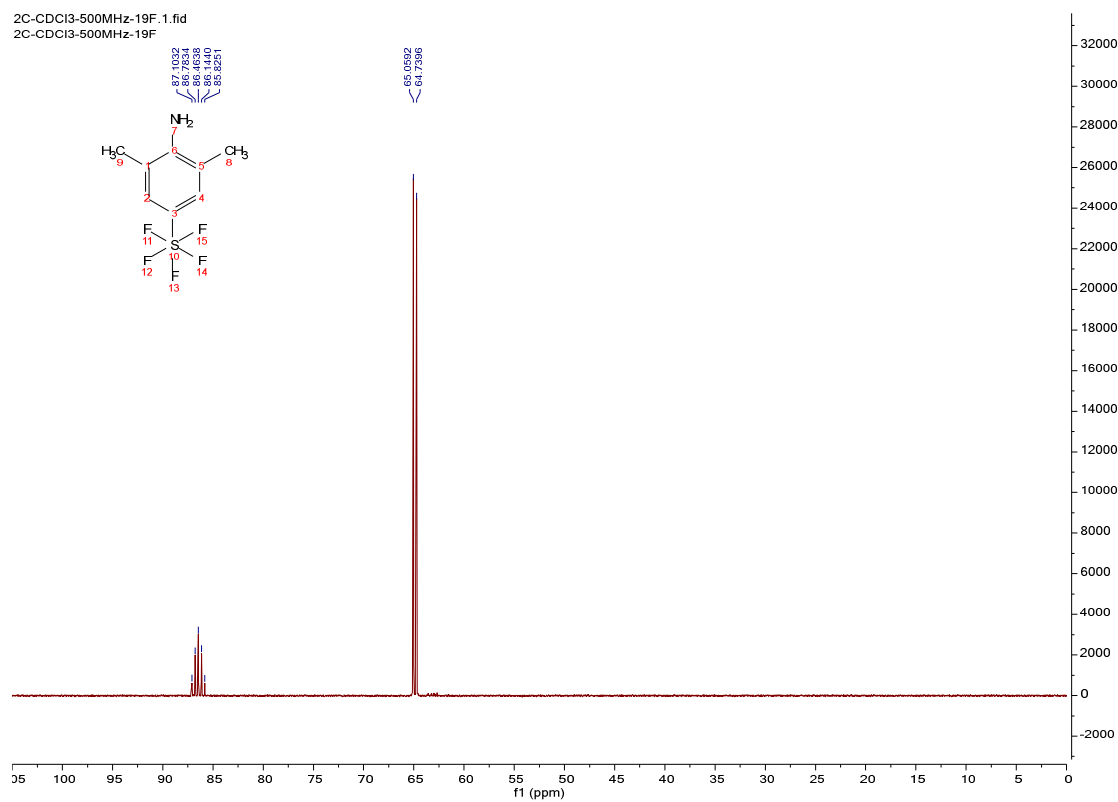

**$^1\text{H}$ ,  $^{13}\text{C}$  and  $^{19}\text{F}$  NMR spectroscopy of 1d.**KJG-TS-169-2- $\text{CDCl}_3$ 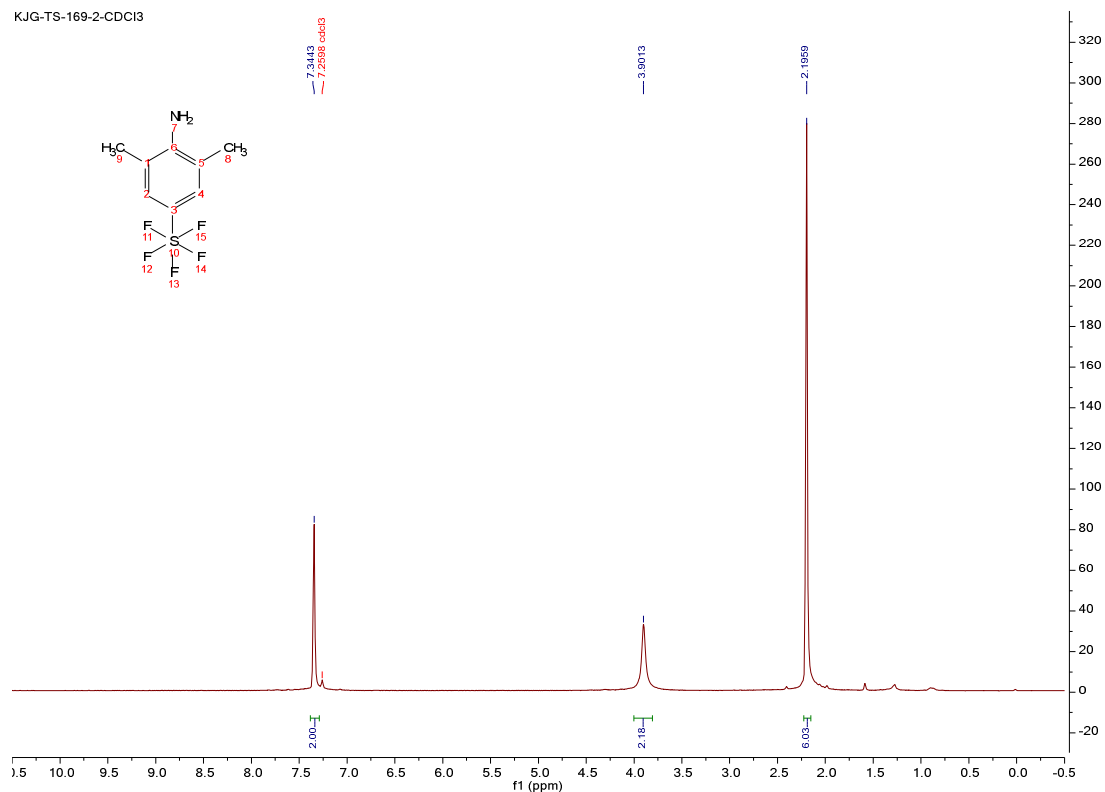KJG-TS-356-re-4- $\text{CDCl}_3$ -400MHz-13C:1.fid  
KJG-TS-356-re-4- $\text{CDCl}_3$ -400MHz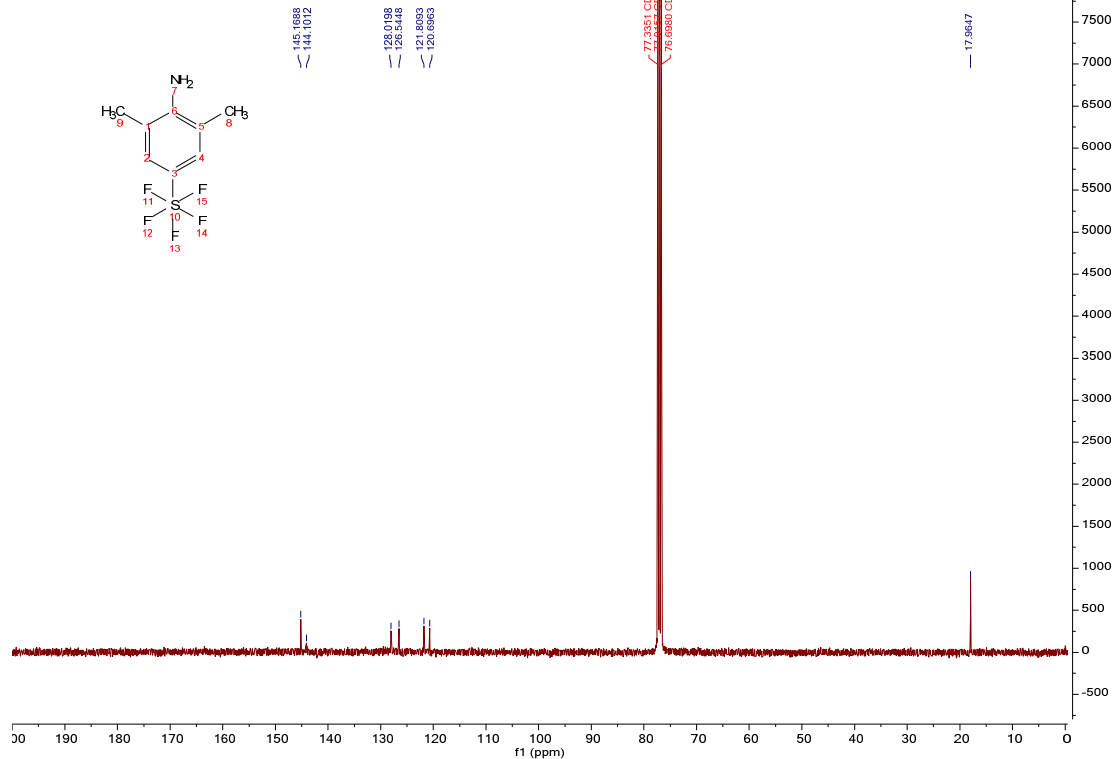

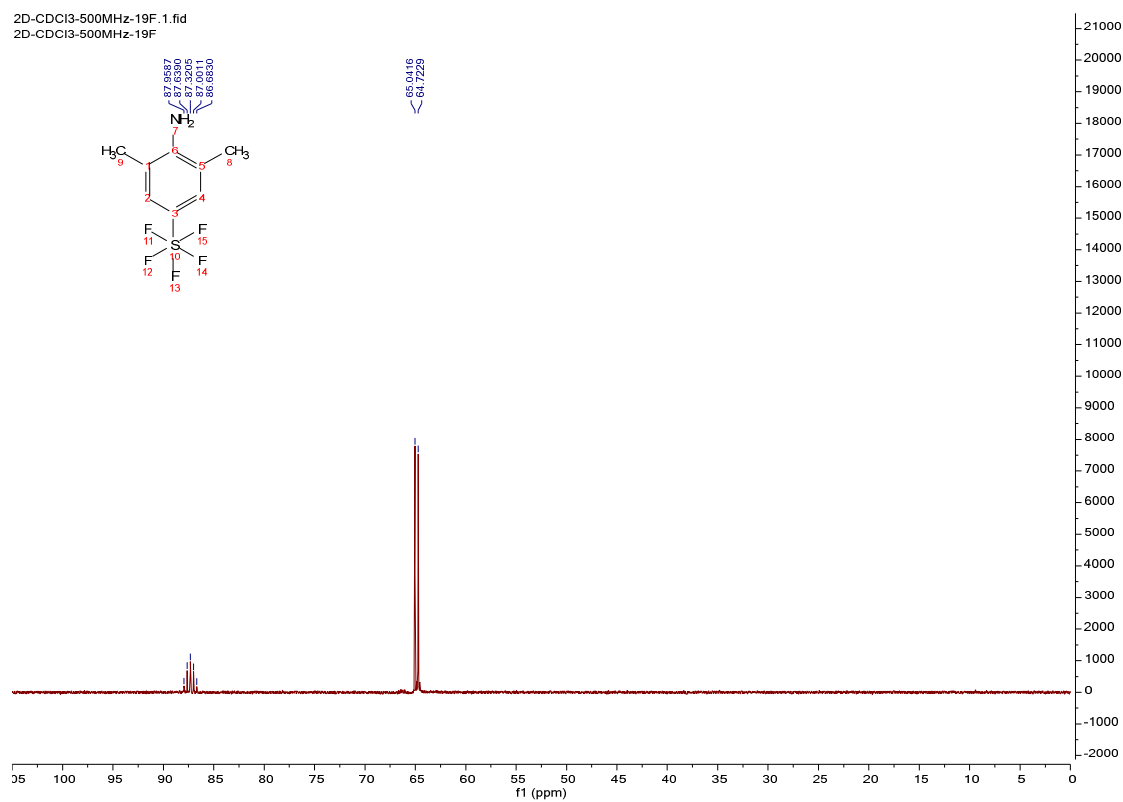

### $^1\text{H}$ , $^{13}\text{C}$ and $^{19}\text{F}$ NMR spectroscopy of 3.

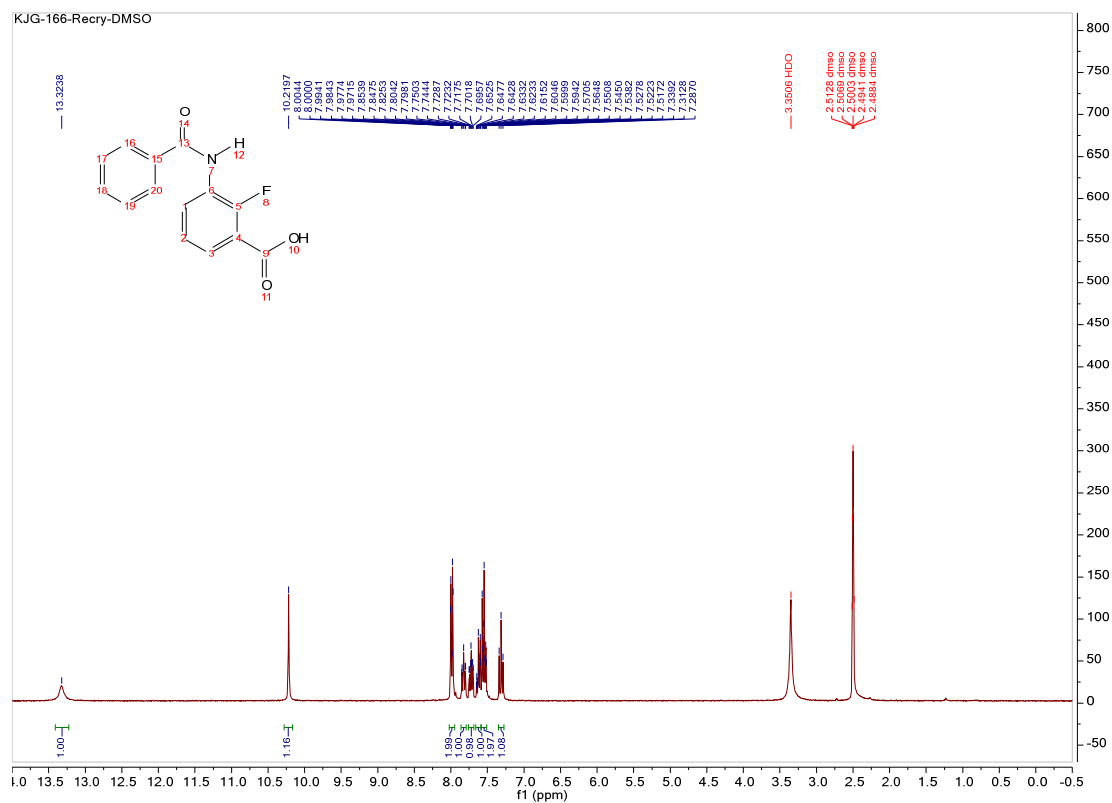

KJG-TS-Benzoylation-DMSO-400MHz-13C. 13.fid  
KJG-TS-Benzoylation-DMSO-400MHz-13C

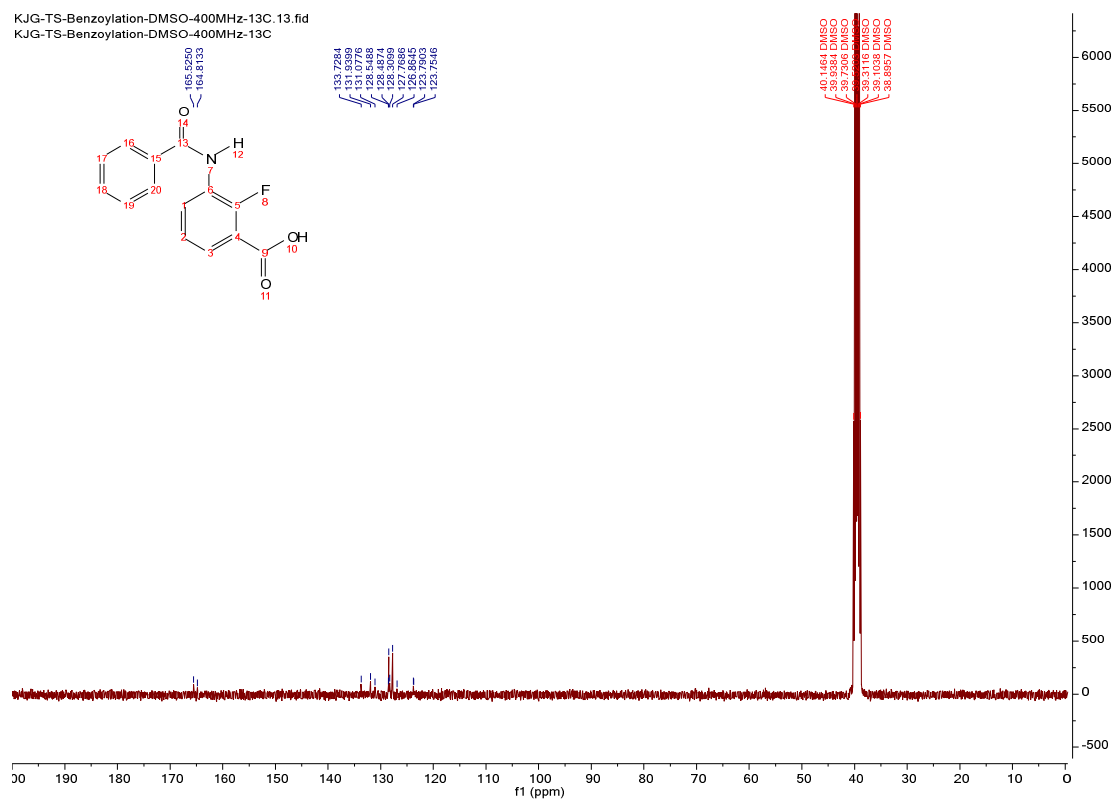

KJG-TS-Benzoylation-DMSO-500MHz-19F. 1.fid  
KJG-TS-Benzoylation-DMSO-500MHz-19F

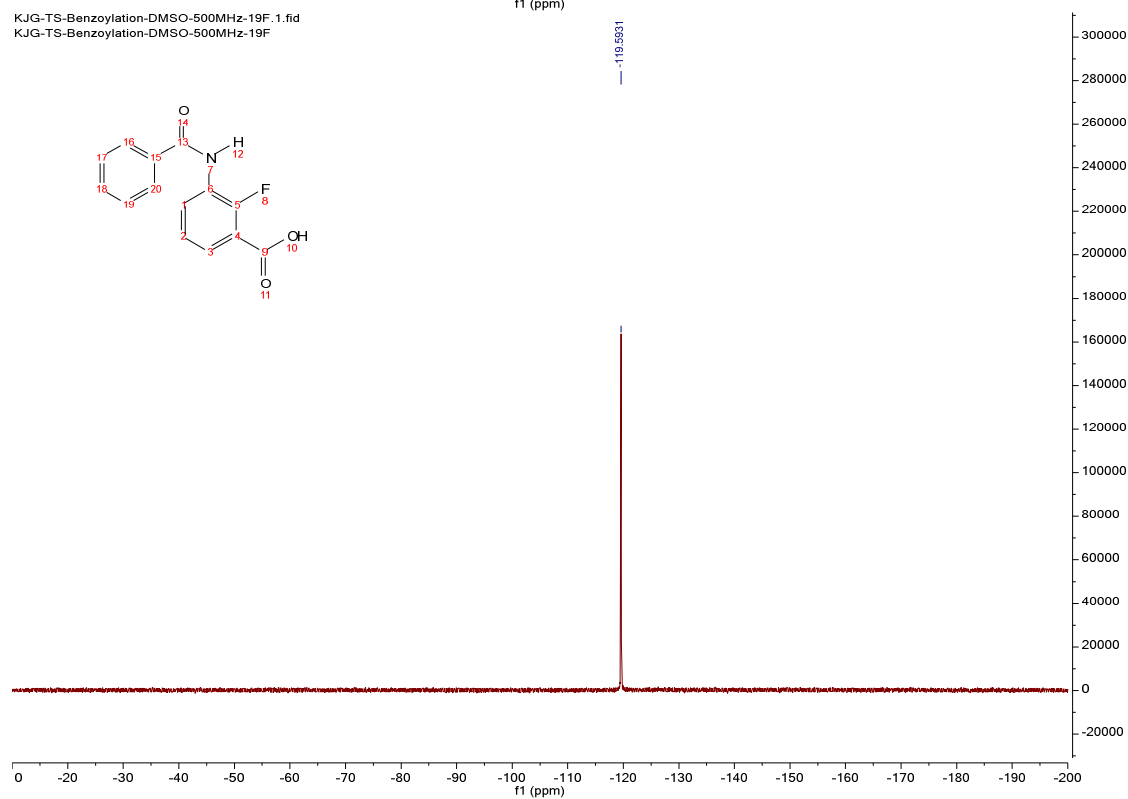

**$^1\text{H}$ ,  $^{13}\text{C}$  and  $^{19}\text{F}$  NMR spectroscopy of 4a.**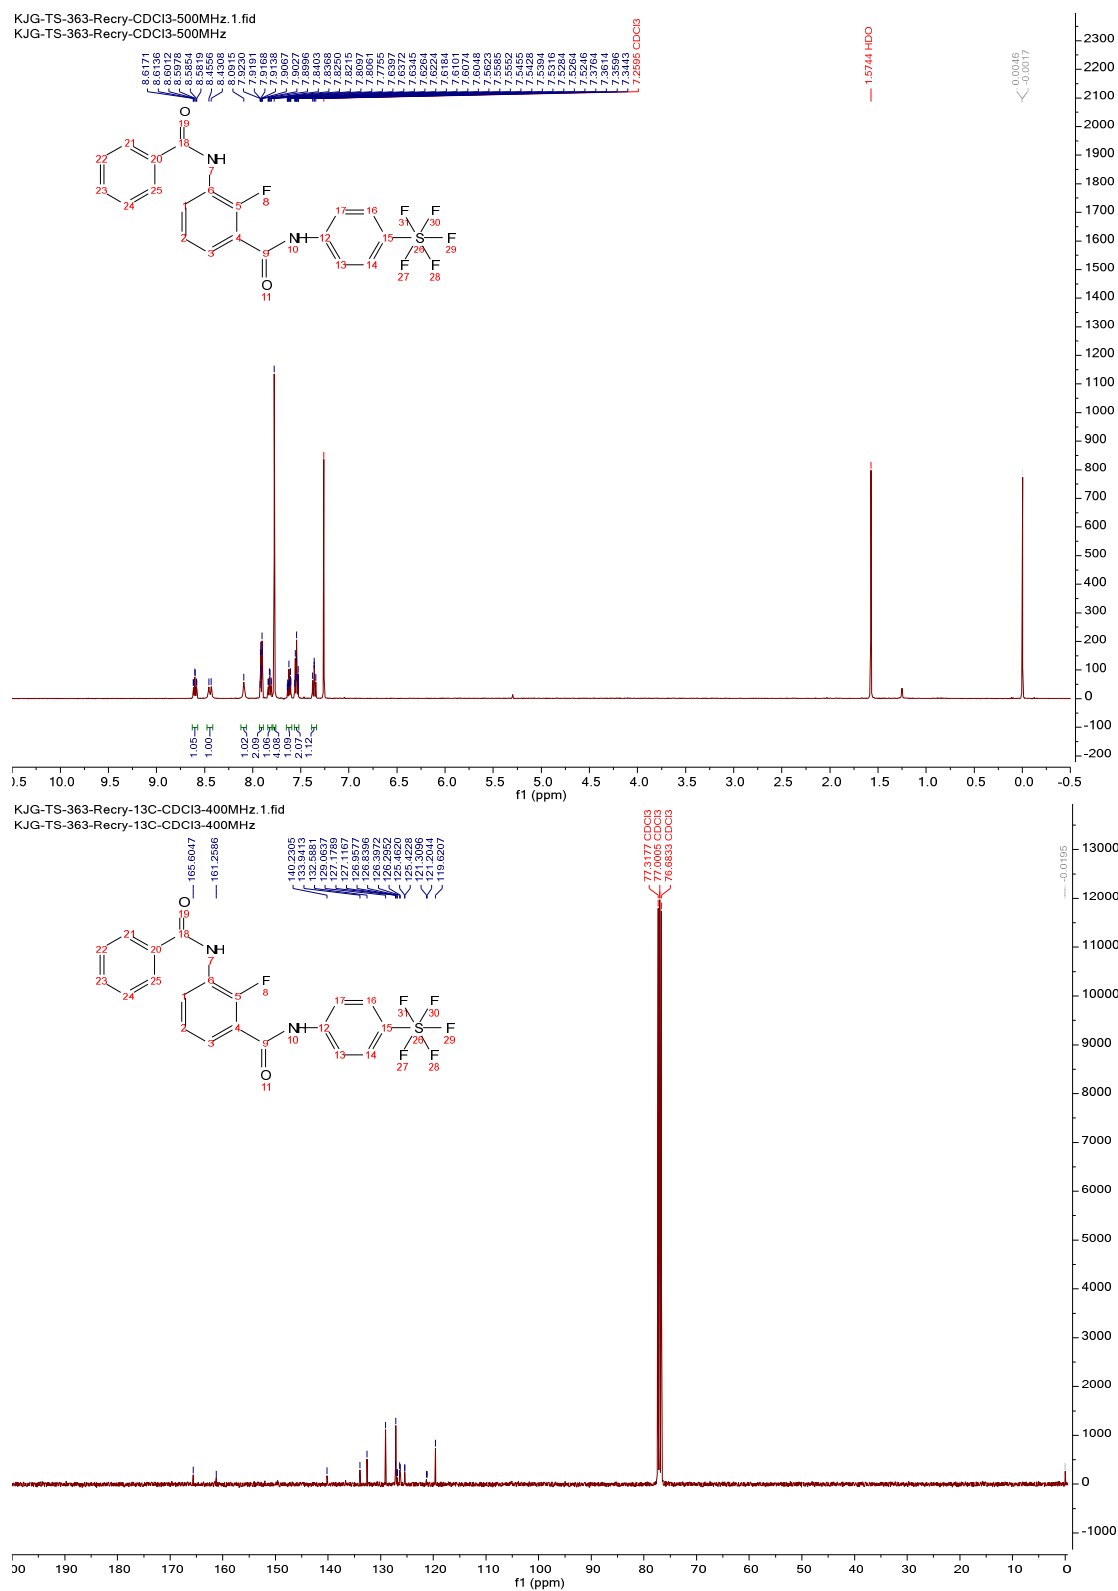



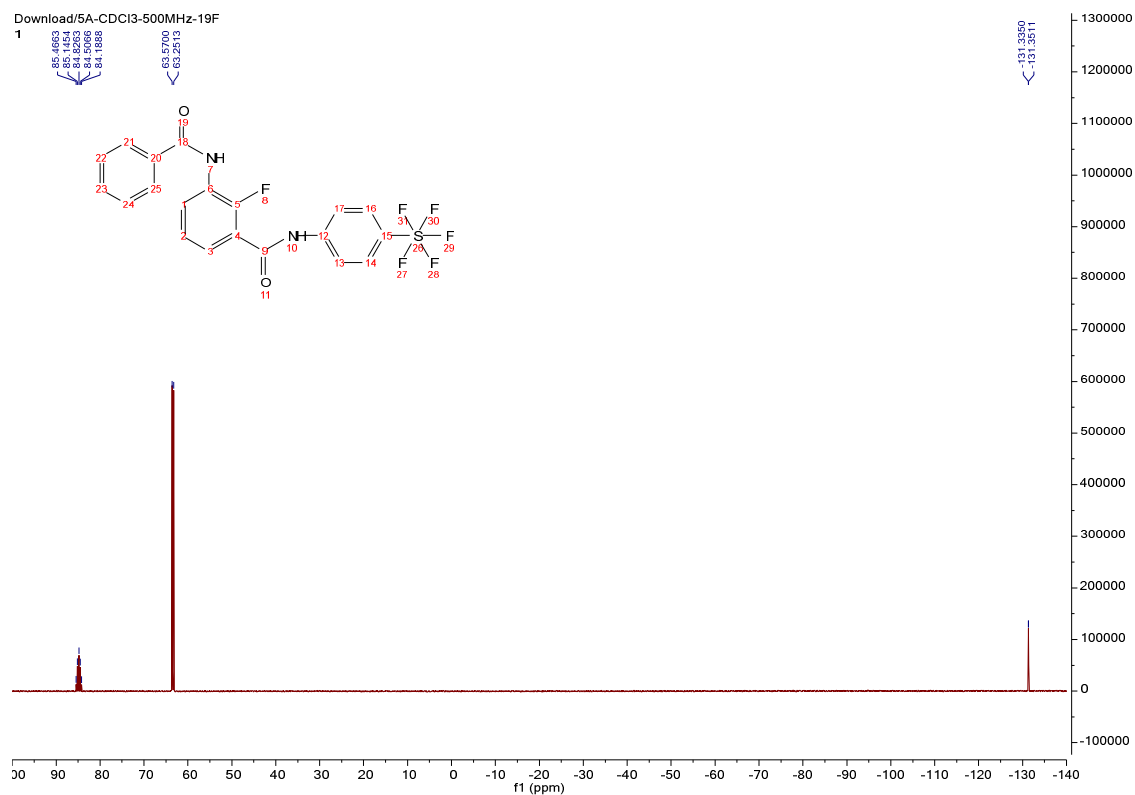

**$^1\text{H}$ ,  $^{13}\text{C}$  and  $^{19}\text{F}$  NMR spectroscopy of 4b.**

KJG-TS-365-1-re-CDCl<sub>3</sub>-500MHz-1.fid  
KJG-TS-365-1-re-CDCl<sub>3</sub>-500MHz

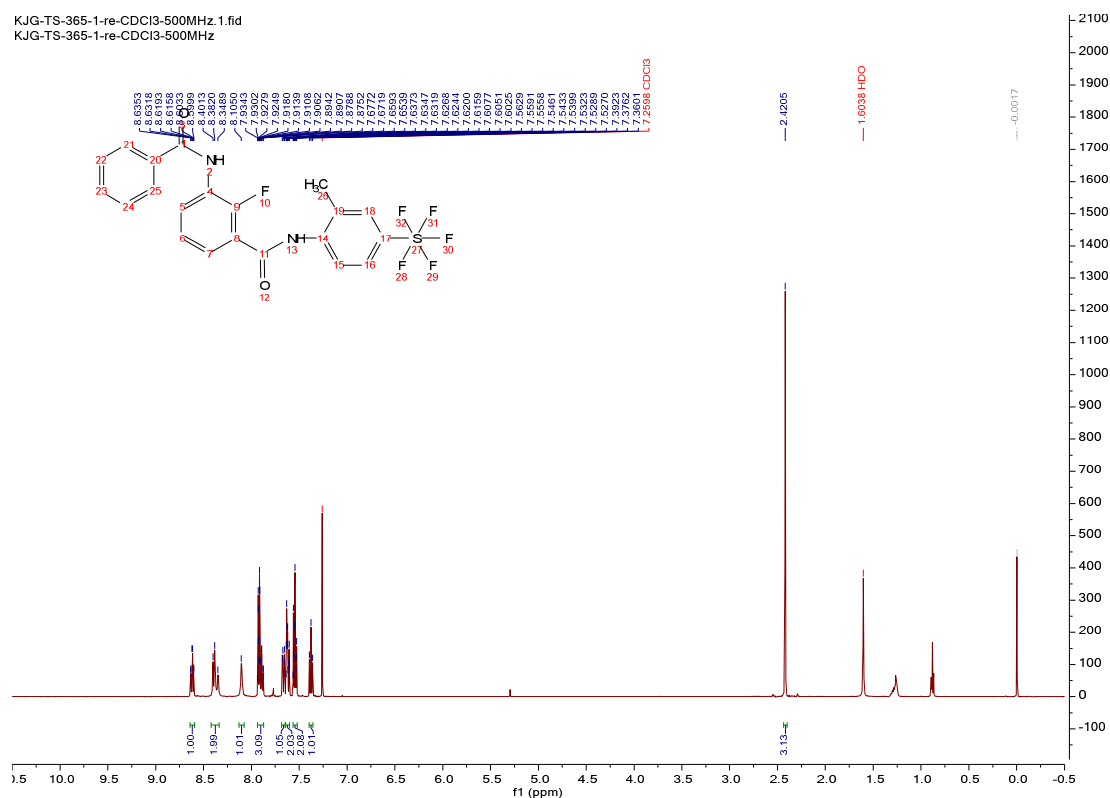

KJG-TS-365-1-re-CDCl<sub>3</sub>-400MHz-13C-1.fid  
KJG-TS-365-1-re-CDCl<sub>3</sub>-400MHz-13C

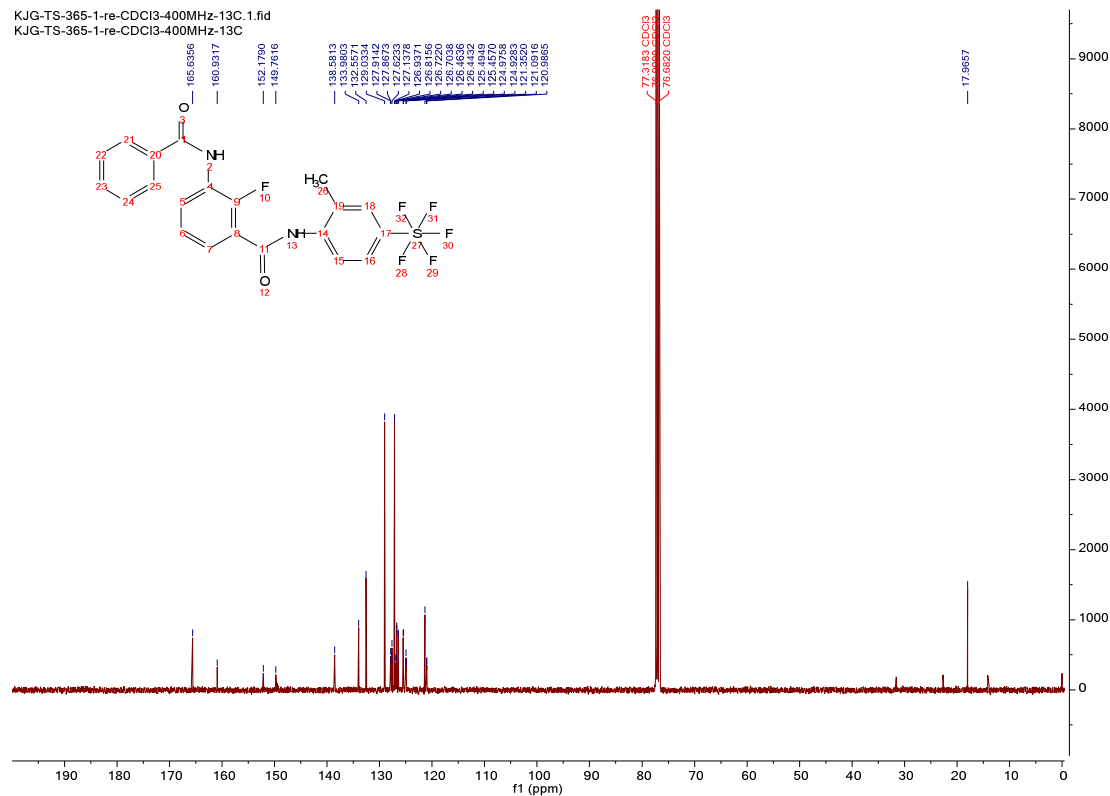

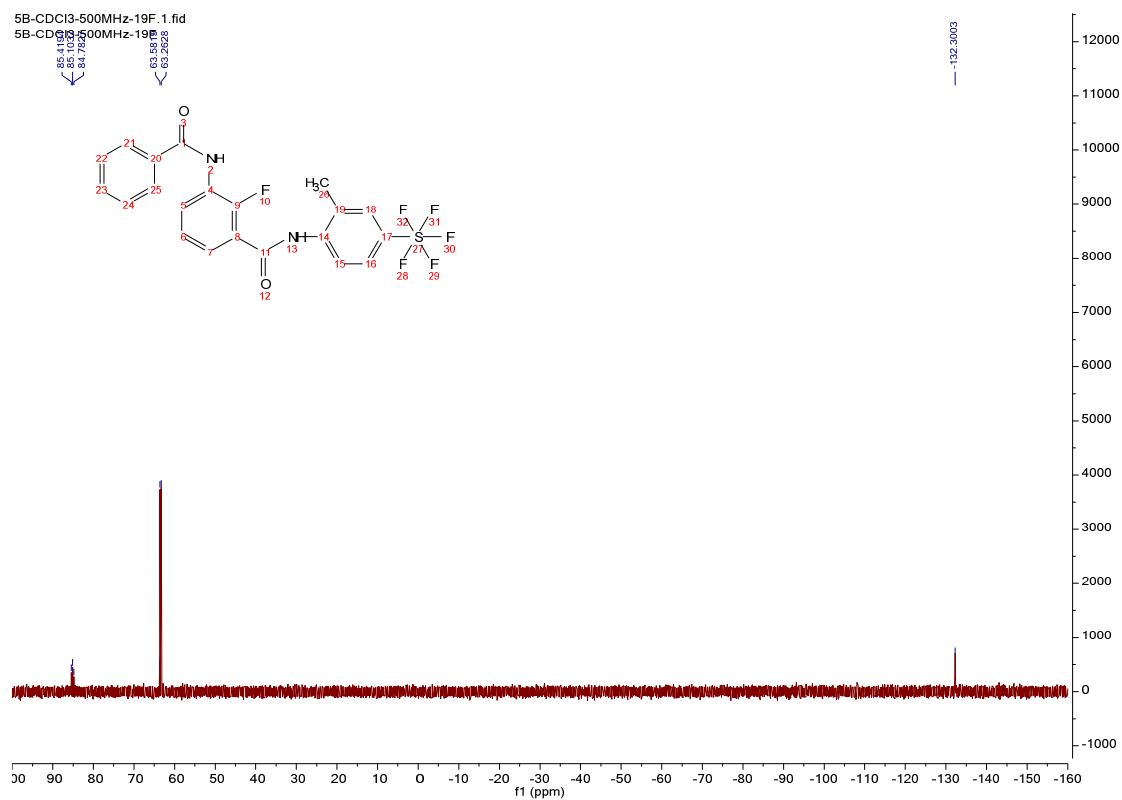

**$^1\text{H}$ ,  $^{13}\text{C}$  and  $^{19}\text{F}$  NMR spectroscopy of 4c.**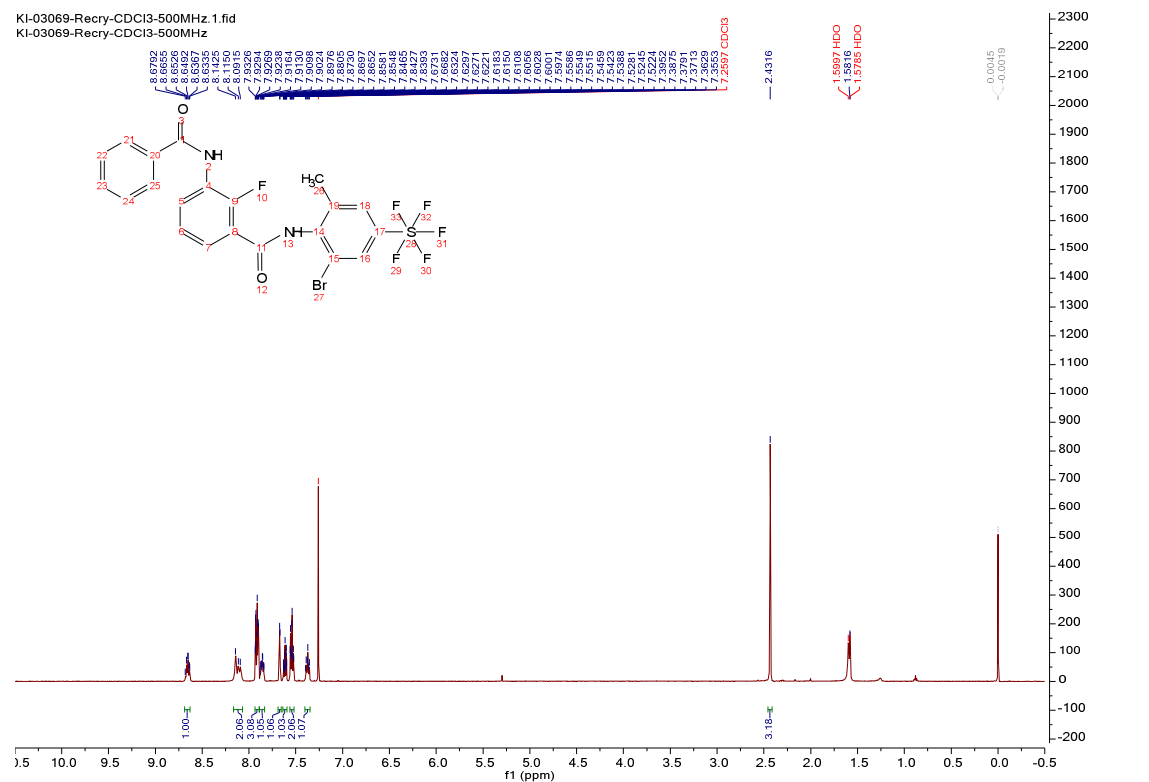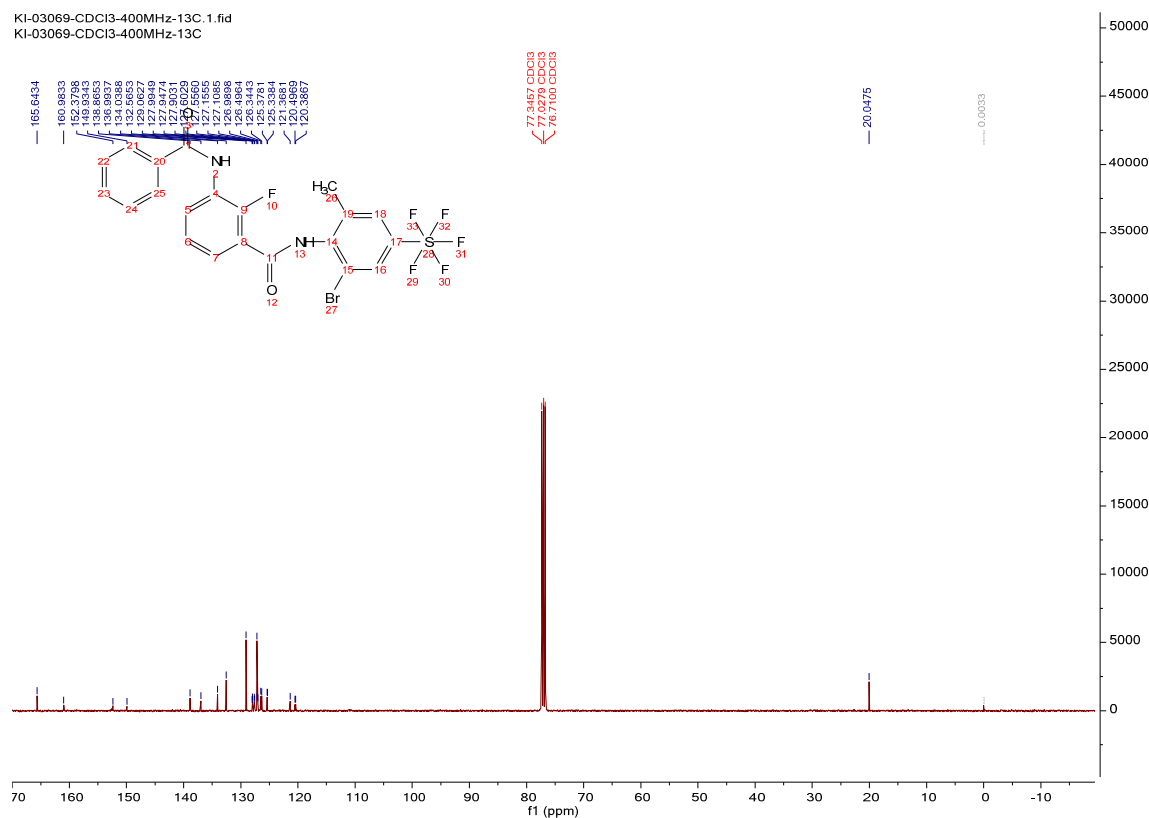

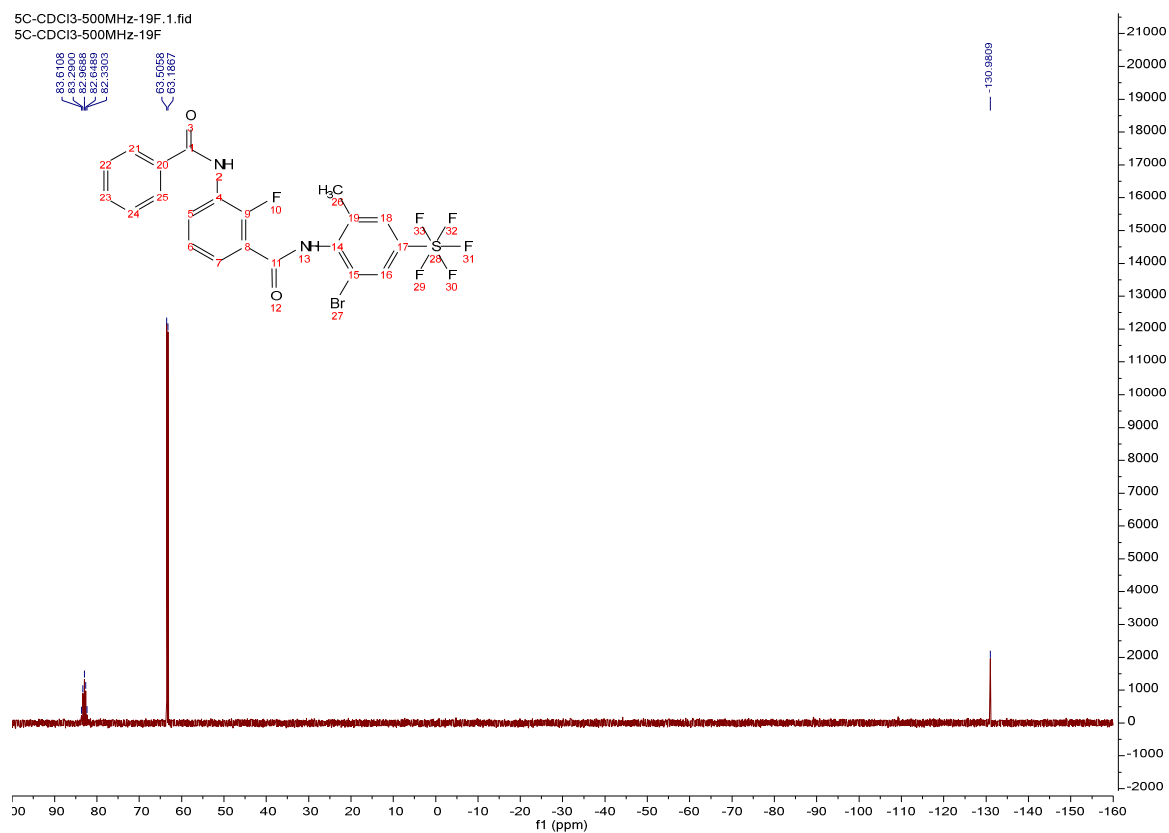

**$^1\text{H}$ ,  $^{13}\text{C}$  and  $^{19}\text{F}$  NMR spectroscopy of 4d.**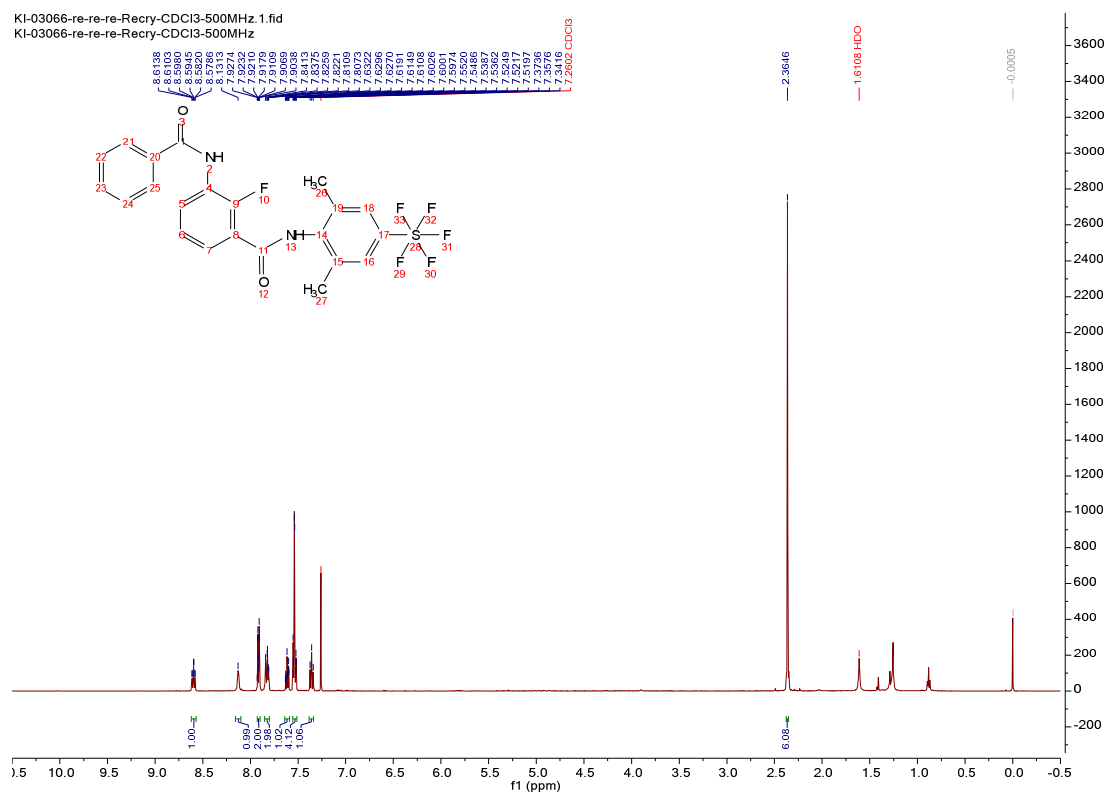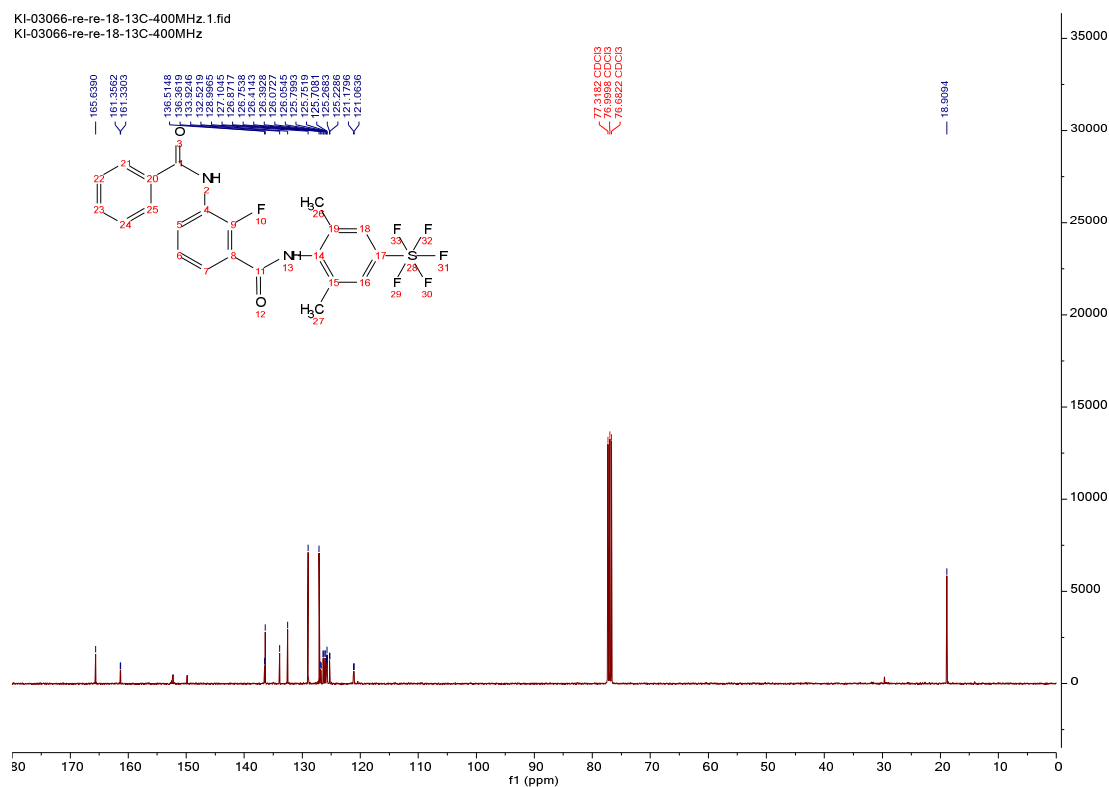

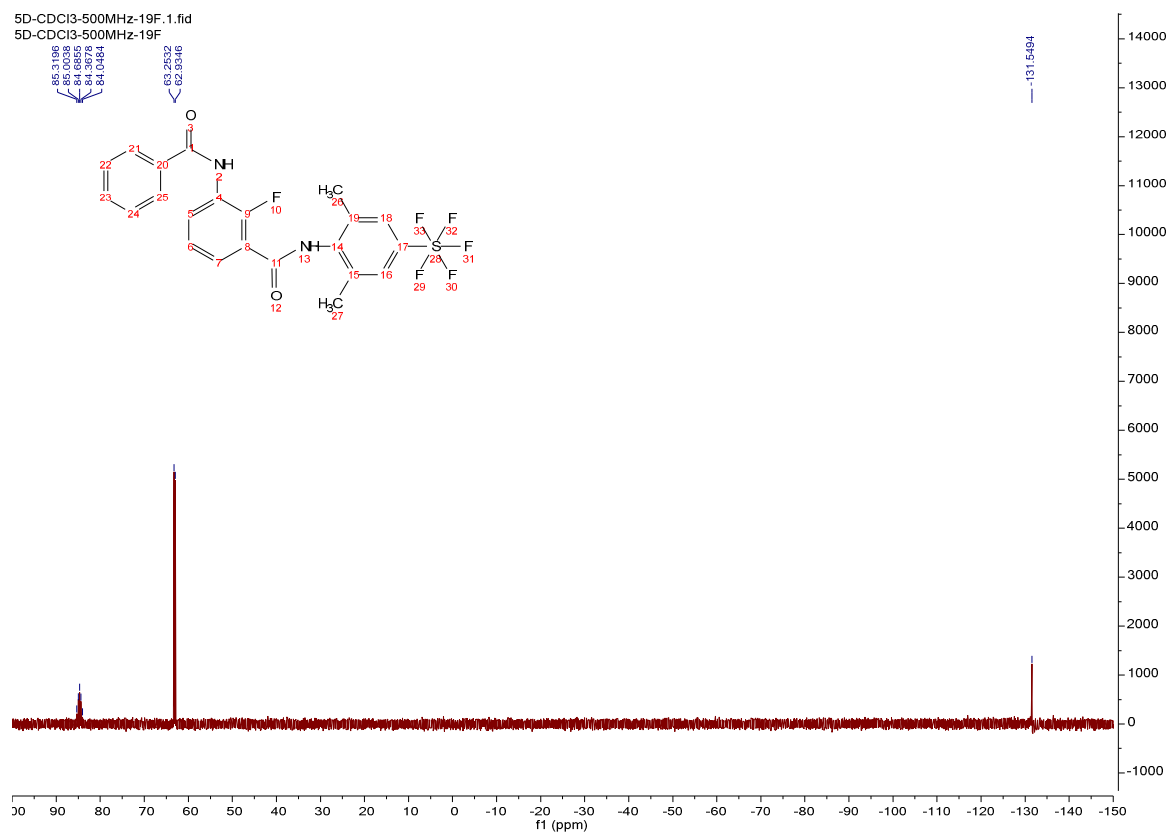

**Table S1 and S2: Larvicidal activity against *Plutella xylostella* (4c and 4d)**

The larvicidal activities of synthesized compounds were evaluated by the leaf-dip procedure. The aqueous solution of prepared compounds and Broflanilide in acetone (H<sub>2</sub>O : acetone = 95 : 5) were sprayed to a cabbage leave placed on moistened filter paper (disc, diameter 8.8 cm) in petri dishes. After allowing to dry, the dishes were infested with 10 *Plutella xylostella* (third-instar). After 1, 2, 3, and 4 days, percentage of mortalities was evaluated. The treatments were replicated three times. For negative control, larvicidal activities were 0 % at each time. Ref. is Broflanilide as a positive control.

**Table S1. Larvicidal activity depend on time.**

| Entry | Compound | Concentration (ppm) | Against the 3 <sup>rd</sup> Instar Larvae of <i>Plutella xylostella</i> |      |      |         |
|-------|----------|---------------------|-------------------------------------------------------------------------|------|------|---------|
|       |          |                     | Larvicidal activity (%) at 24 h                                         |      |      |         |
|       |          |                     | 1                                                                       | 2    | 3    | Average |
| 1     | 4c       | 10                  | 50.0                                                                    | 60.0 | 60.0 | 56.7    |
| 2     | 4d       | 10                  | 0                                                                       | 10.0 | 20.0 | 10.0    |
| 3     | Ref.     | 10                  | 100                                                                     | 100  | 100  | 100.0   |

| Entry | Compound | Concentration (ppm) | Against the 3 <sup>rd</sup> Instar Larvae of <i>Plutella xylostella</i> |      |      |         |
|-------|----------|---------------------|-------------------------------------------------------------------------|------|------|---------|
|       |          |                     | Larvicidal activity (%) at 48 h                                         |      |      |         |
|       |          |                     | 1                                                                       | 2    | 3    | Average |
| 1     | 4c       | 10                  | 90.0                                                                    | 90.0 | 90.0 | 90.0    |
| 2     | 4d       | 10                  | 90.0                                                                    | 70.0 | 80.0 | 80.0    |
| 4     | Ref.     | 10                  | 100                                                                     | 100  | 100  | 100.0   |

| Entry | Compound | Concentration (ppm) | Against the 3 <sup>rd</sup> Instar Larvae of <i>Plutella xylostella</i> |      |      |         |
|-------|----------|---------------------|-------------------------------------------------------------------------|------|------|---------|
|       |          |                     | Larvicidal activity (%) at 72 h                                         |      |      |         |
|       |          |                     | 1                                                                       | 2    | 3    | Average |
| 1     | 4c       | 10                  | 90.0                                                                    | 90.0 | 90.0 | 90.0    |
| 2     | 4d       | 10                  | 90.0                                                                    | 80.0 | 80.0 | 83.3    |
| 4     | Ref.     | 10                  | 100                                                                     | 100  | 100  | 100.0   |

| Entry | Compound | Concentration (ppm) | Against the 3 <sup>rd</sup> Instar Larvae of <i>Plutella xylostella</i> |      |      |         |
|-------|----------|---------------------|-------------------------------------------------------------------------|------|------|---------|
|       |          |                     | Larvicidal activity (%) at 96 h                                         |      |      |         |
|       |          |                     | 1                                                                       | 2    | 3    | Average |
| 1     | 4c       | 10                  | 90.0                                                                    | 90.0 | 90.0 | 90.0    |
| 2     | 4d       | 10                  | 90.0                                                                    | 90.0 | 80.0 | 86.7    |
| 4     | Ref.     | 10                  | 100                                                                     | 100  | 100  | 100.0   |



Table S2. Picture of eating area.

| Entry | Compd                                      | Pictures of eating area_ after 96 h<br>(The 3 <sup>rd</sup> instar stage larvae of <i>Spodoptera litura</i> ) |
|-------|--------------------------------------------|---------------------------------------------------------------------------------------------------------------|
| 1     | 4c                                         |  <p>5–10 % eating</p>       |
| 2     | 4d                                         |  <p>0–5 % eating</p>        |
| 3     | Ref.<br>positive control<br>(Broflanilide) |  <p>0–5 % eating</p>       |
| 4     | Negative control                           |                           |

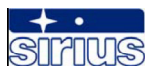

## pH-metric

Sample name: **KI-03066**  
 Assay name: **pH-metric medium logP**  
 Assay ID: **20I-08012**  
 Filename: **D:\Data\Customer\20I-08012\_KI-03066\_pH-metric medium logP.t3r**

Experiment start time: **08/09/2020 07:26:11**  
 Analyst:  
 Instrument ID: **T313101**

## Overall results

RMSD 0.168  
 Average ionic strength 0.156 M  
 Average temperature 25.0°C  
 Partition ratio 0.2833 : 1  
 Analyte concentration range 1430.9 µM to 1492.8 µM  
 Total points considered 30 of 44

## Warnings and errors

Errors None  
 Warnings Sample concentration factor out of range

## Four-Plus parameters

Alpha 0.072 08/09/2020 07:26:11 D:\Data\Customer\20I-07022\_Blank standardisation.t3r  
 S 1.0038 08/09/2020 07:26:11 D:\Data\Customer\20I-07022\_Blank standardisation.t3r  
 jH 0.4 08/09/2020 07:26:11 D:\Data\Customer\20I-07022\_Blank standardisation.t3r  
 jOH -0.3 08/09/2020 07:26:11 D:\Data\Customer\20I-07022\_Blank standardisation.t3r

## Titrants

0.50 M HCl 0.979835 08/09/2020 07:26:11 D:\Data\Customer\20I-07023\_Blank standardisation.t3r  
 0.50 M KOH 1.004720 08/09/2020 07:26:11 D:\Data\Customer\20I-07020\_KHP\_Base standardisation using KHP.t3r

## Sample

KI-03066 concentration factor 0.088  
 Acid pKa 1 11.00  
 Acid pKa 2 12.20  
 logP (neutral XH<sub>2</sub>) 4.68  
 logP (XH<sup>-</sup>) 6.11  
 logP (X<sup>2-</sup>) -3.45

## Sample graphs

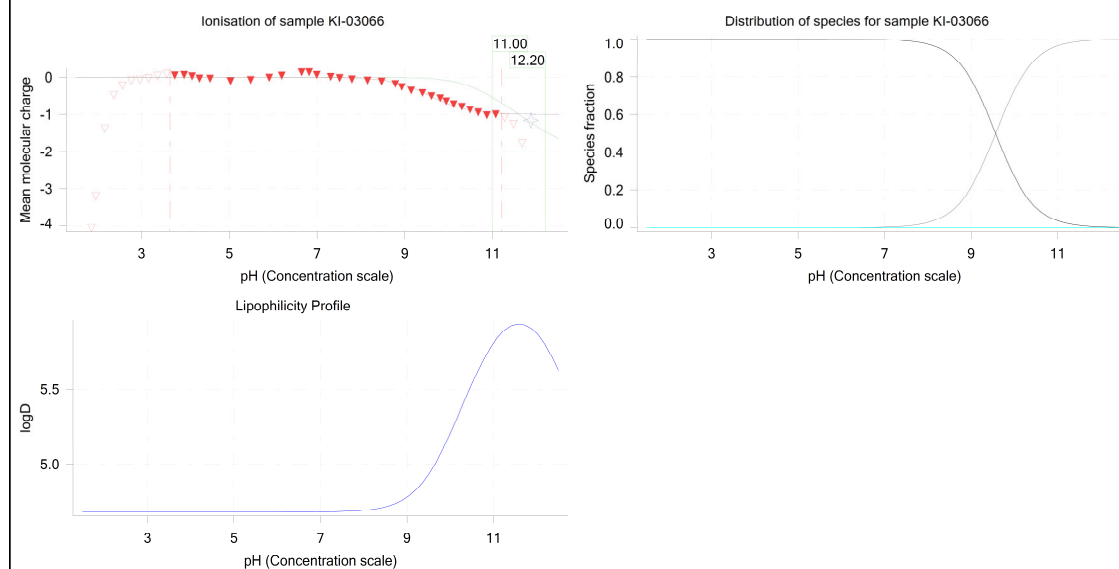

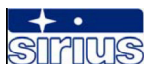

## pH-metric

Sample name: **KI-03066** Experiment start time: **08/09/2020 07:26:11**  
 Assay name: **pH-metric medium logP** Analyst:  
 Assay ID: **20I-08012** Instrument ID: **T313101**  
 Filename: **D:\Data\Customer\20I-08012\_KI-03066\_pH-metric medium logP.t3r**

## Sample logD and percent species

| pH     | KI-03066<br>logD | KI-03066<br>KI-03066H2 | KI-03066<br>KI-03066H | KI-03066<br>KI-03066 | KI-03066<br>KI-03066H2* | KI-03066<br>KI-03066H* | KI-03066<br>KI-03066* | Comment    |
|--------|------------------|------------------------|-----------------------|----------------------|-------------------------|------------------------|-----------------------|------------|
| 1.000  | 4.68             | 0.01 %                 | 0.00 %                | 0.00 %               | 99.99 %                 | 0.00 %                 | 0.00 %                | Stomach pH |
| 1.200  | 4.68             | 0.01 %                 | 0.00 %                | 0.00 %               | 99.99 %                 | 0.00 %                 | 0.00 %                |            |
| 2.000  | 4.68             | 0.01 %                 | 0.00 %                | 0.00 %               | 99.99 %                 | 0.00 %                 | 0.00 %                |            |
| 3.000  | 4.68             | 0.01 %                 | 0.00 %                | 0.00 %               | 99.99 %                 | 0.00 %                 | 0.00 %                |            |
| 4.000  | 4.68             | 0.01 %                 | 0.00 %                | 0.00 %               | 99.99 %                 | 0.00 %                 | 0.00 %                |            |
| 5.000  | 4.68             | 0.01 %                 | 0.00 %                | 0.00 %               | 99.99 %                 | 0.00 %                 | 0.00 %                | Blood pH   |
| 6.000  | 4.68             | 0.01 %                 | 0.00 %                | 0.00 %               | 99.97 %                 | 0.03 %                 | 0.00 %                |            |
| 6.500  | 4.68             | 0.01 %                 | 0.00 %                | 0.00 %               | 99.91 %                 | 0.09 %                 | 0.00 %                |            |
| 7.000  | 4.68             | 0.01 %                 | 0.00 %                | 0.00 %               | 99.72 %                 | 0.27 %                 | 0.00 %                |            |
| 7.400  | 4.68             | 0.01 %                 | 0.00 %                | 0.00 %               | 99.31 %                 | 0.68 %                 | 0.00 %                |            |
| 8.000  | 4.69             | 0.01 %                 | 0.00 %                | 0.00 %               | 97.35 %                 | 2.65 %                 | 0.00 %                |            |
| 9.000  | 4.78             | 0.01 %                 | 0.00 %                | 0.00 %               | 78.62 %                 | 21.37 %                | 0.00 %                |            |
| 10.000 | 5.20             | 0.00 %                 | 0.00 %                | 0.00 %               | 26.89 %                 | 73.10 %                | 0.00 %                |            |
| 11.000 | 5.81             | 0.00 %                 | 0.00 %                | 0.00 %               | 3.55 %                  | 96.45 %                | 0.00 %                |            |
| 12.000 | 5.87             | 0.00 %                 | 0.00 %                | 0.00 %               | 0.37 %                  | 99.63 %                | 0.00 %                |            |

## Carbonate and acidity

Carbonate 0.138 mM  
 Acidity error 0.539 mM

## Other graphs

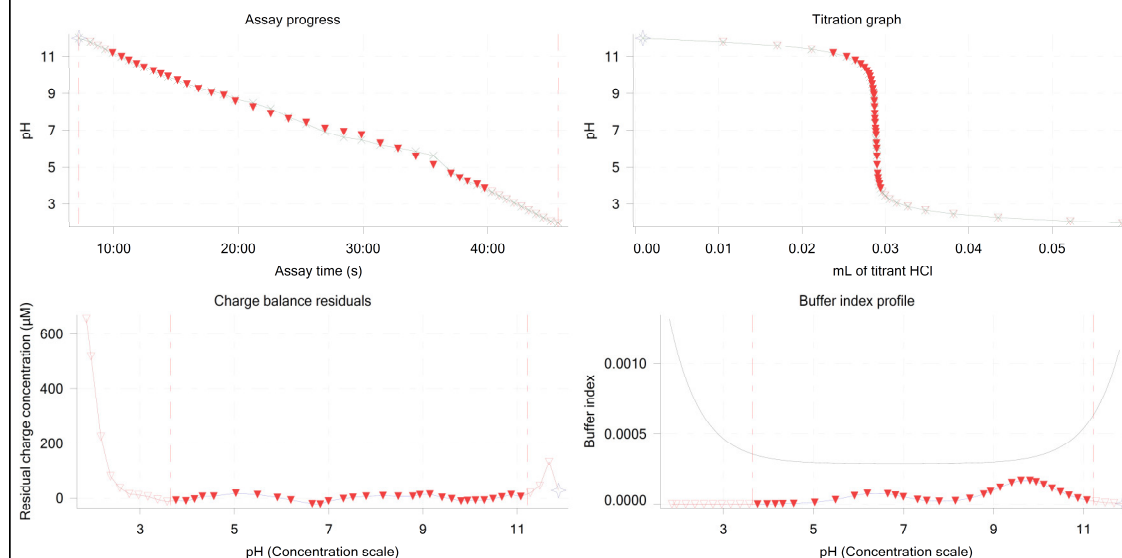

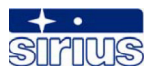

## pH-metric

Sample name: **KI-03066**  
Assay name: **pH-metric medium logP**  
Assay ID: **20I-08012**  
Filename: **D:\Data\Customer\20I-08012\_KI-03066\_pH-metric medium logP.t3r**

Experiment start time: **08/09/2020 07:26:11**  
Analyst:  
Instrument ID: **T313101**

## Other graphs (continued)

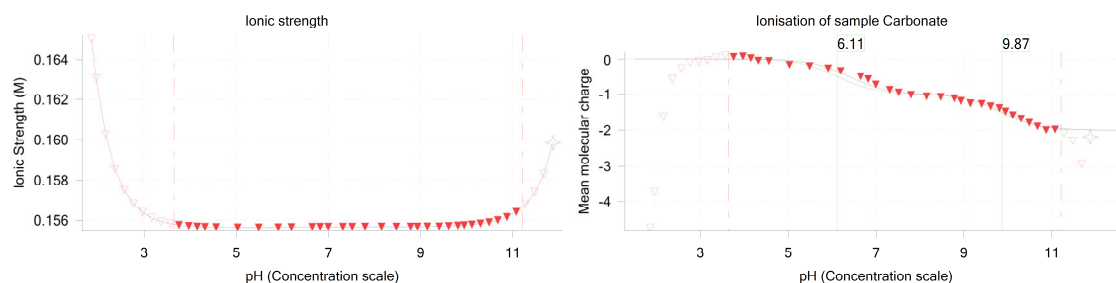

Figure S1. pH-metric Log P of compounds **4d** (KI-03066).

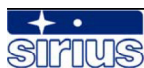

## pH-metric

Sample name: **KI-ref-B**  
 Assay name: **pH-metric medium logP**  
 Assay ID: **20I-08011**  
 Filename: **D:\Data\Customer\20I-08011\_KI-ref-B\_pH-metric medium logP.t3r**

Experiment start time: **08/09/2020 06:53:17**  
 Analyst:  
 Instrument ID: **T313101**

## Overall results

RMSD 0.157  
 Average ionic strength 0.156 M  
 Average temperature 25.0°C  
 Partition ratio 0.2834 : 1  
 Analyte concentration range 1063.3 µM to 1110.3 µM  
 Total points considered 21 of 32

## Warnings and errors

Errors None  
 Warnings Sample concentration factor out of range

## Four-Plus parameters

Alpha 0.072 08/09/2020 06:53:17 D:\Data\Customer\20I-07022\_Blank standardisation.t3r  
 S 1.0038 08/09/2020 06:53:17 D:\Data\Customer\20I-07022\_Blank standardisation.t3r  
 jH 0.4 08/09/2020 06:53:17 D:\Data\Customer\20I-07022\_Blank standardisation.t3r  
 jOH -0.3 08/09/2020 06:53:17 D:\Data\Customer\20I-07022\_Blank standardisation.t3r

## Titrants

0.50 M HCl 0.979835 08/09/2020 06:53:17 D:\Data\Customer\20I-07023\_Blank standardisation.t3r  
 0.50 M KOH 1.004720 08/09/2020 06:53:17 D:\Data\Customer\20I-07020\_KHP\_Base standardisation using KHP.t3r

## Sample

KI-ref-B concentration factor 0.096  
 Acid pKa 1 10.30  
 logP (neutral XH) 4.22  
 logP (X<sup>-</sup>) 3.81

## Sample graphs

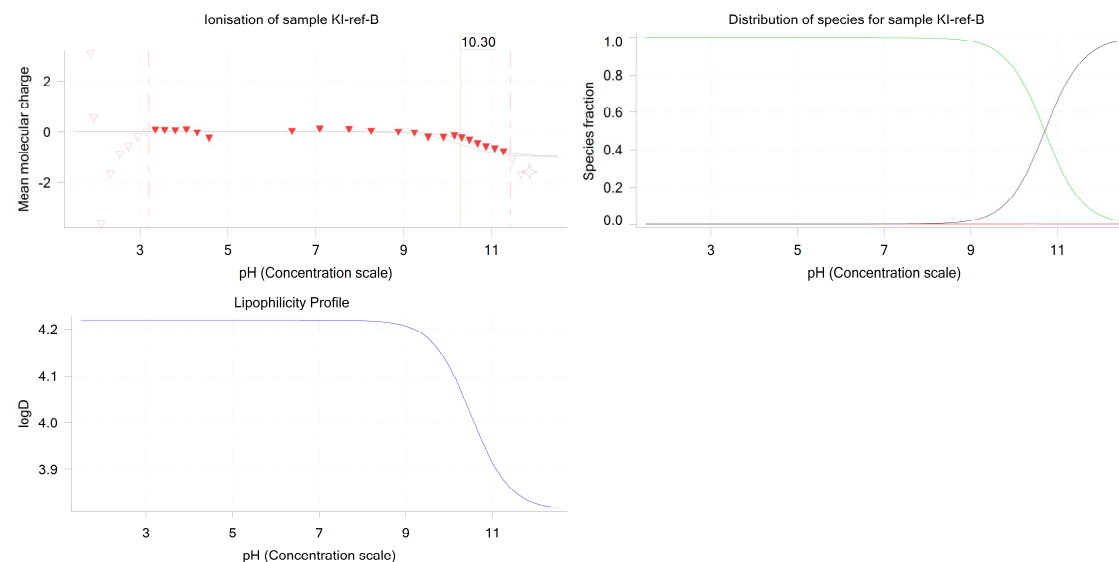

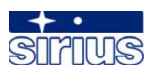

## pH-metric

Sample name: **KI-ref-B** Experiment start time: **08/09/2020 06:53:17**  
 Assay name: **pH-metric medium logP** Analyst:  
 Assay ID: **20I-08011** Instrument ID: **T313101**  
 Filename: **D:\Data\Customer\20I-08011\_KI-ref-B\_pH-metric medium logP.t3r**

## Sample logD and percent species

| pH     | KI-ref-B<br>logD | KI-ref-B<br>KI-ref-BH | KI-ref-B<br>KI-ref-B | KI-ref-B<br>KI-ref-BH* | KI-ref-B<br>KI-ref-B* | Comment    |
|--------|------------------|-----------------------|----------------------|------------------------|-----------------------|------------|
| 1.000  | 4.22             | 0.02 %                | 0.00 %               | 99.98 %                | 0.00 %                | Stomach pH |
| 1.200  | 4.22             | 0.02 %                | 0.00 %               | 99.98 %                | 0.00 %                |            |
| 2.000  | 4.22             | 0.02 %                | 0.00 %               | 99.98 %                | 0.00 %                |            |
| 3.000  | 4.22             | 0.02 %                | 0.00 %               | 99.98 %                | 0.00 %                |            |
| 4.000  | 4.22             | 0.02 %                | 0.00 %               | 99.98 %                | 0.00 %                |            |
| 5.000  | 4.22             | 0.02 %                | 0.00 %               | 99.98 %                | 0.00 %                | Blood pH   |
| 6.000  | 4.22             | 0.02 %                | 0.00 %               | 99.98 %                | 0.00 %                |            |
| 6.500  | 4.22             | 0.02 %                | 0.00 %               | 99.97 %                | 0.01 %                |            |
| 7.000  | 4.22             | 0.02 %                | 0.00 %               | 99.96 %                | 0.02 %                |            |
| 7.400  | 4.22             | 0.02 %                | 0.00 %               | 99.93 %                | 0.05 %                |            |
| 8.000  | 4.22             | 0.02 %                | 0.00 %               | 99.78 %                | 0.20 %                |            |
| 9.000  | 4.21             | 0.02 %                | 0.00 %               | 98.05 %                | 1.93 %                |            |
| 10.000 | 4.12             | 0.02 %                | 0.01 %               | 83.54 %                | 16.43 %               |            |
| 11.000 | 3.91             | 0.01 %                | 0.04 %               | 33.69 %                | 66.27 %               |            |
| 12.000 | 3.83             | 0.00 %                | 0.05 %               | 4.83 %                 | 95.11 %               |            |

## Carbonate and acidity

Carbonate 0.227 mM  
 Acidity error 0.763 mM

## Other graphs

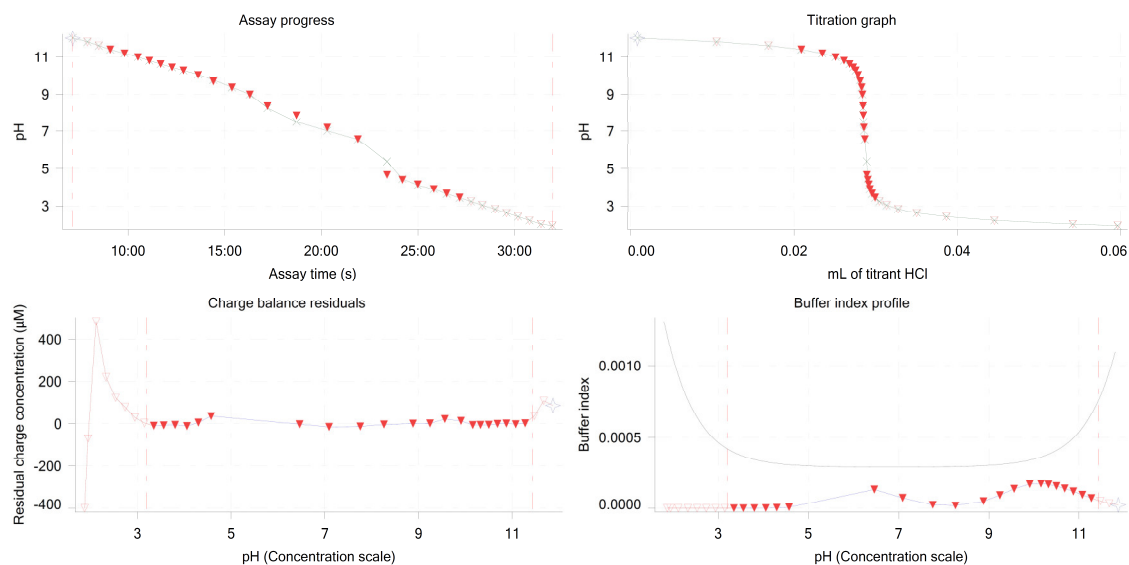

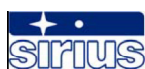

## pH-metric

Sample name: **KI-ref-B**  
Assay name: **pH-metric medium logP**  
Assay ID: **20I-08011**  
Filename: **D:\Data\Customer\20I-08011\_KI-ref-B\_pH-metric medium logP.t3r**

Experiment start time: **08/09/2020 06:53:17**  
Analyst:  
Instrument ID: **T313101**

## Other graphs (continued)

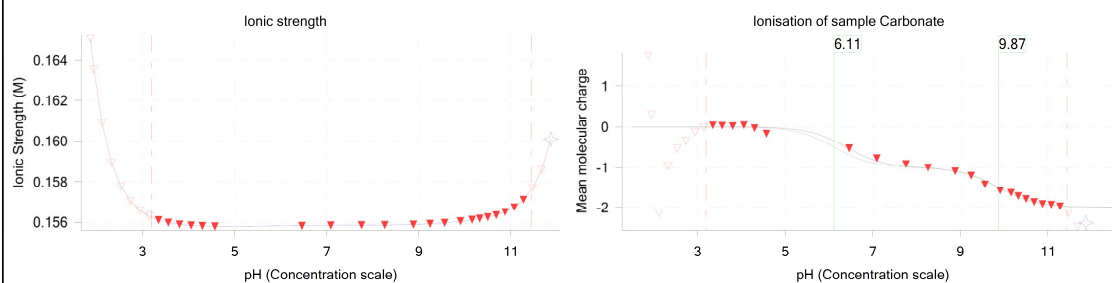

Figure S2. pH-metric Log P of Broflanilide.

Figure S3. Ion Channels assay of 4d (KI-03066) and Broflanilide

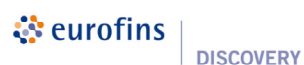

Release Date: 24 Aug 2020

# REPORT

Study Period | 31 Jul 2020 – 21 Aug 2020

---

## STUDY OBJECTIVE:

Client Name: KRICT

Compound Names: KI-03066, KI-Ref.B

Tested in Ion Channel GABAA  $\alpha 1/\beta 3/\gamma 2$  & GlyRA1 Antagonist IonFlux Assays

---

## STUDY INFORMATION:

- Study code#: US034-0009484

Eurofins  
Discovery

6 Research Park Drive  
St Charles MO 63304  
USA

T | +1 844 522 7787  
F | +1 636 362 7131  
[www.eurofins.com](http://www.eurofins.com)



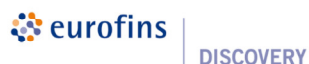

|                        |                                                                                                                                                                                                                                     |                                                                                                                                                                                                                                                                                                                                          |
|------------------------|-------------------------------------------------------------------------------------------------------------------------------------------------------------------------------------------------------------------------------------|------------------------------------------------------------------------------------------------------------------------------------------------------------------------------------------------------------------------------------------------------------------------------------------------------------------------------------------|
| SPONSOR<br>INFORMATION | Name: Sung Joon Park, Ph.D.<br>Company: KRICT<br>Address: Gajeong-ro 141, Yuseong-gu<br>Daejeon, 34114<br>Korea<br>Phone Number: +82 42-860-7085<br>Email: sjunpark@krikt.re.kr                                                     |                                                                                                                                                                                                                                                                                                                                          |
| INVESTIGATOR           | Jennifer Wesley<br>Eurofins Panlabs, Inc.<br>Tel: (636) 362-7147<br>JenniferWesley@eurofins.com                                                                                                                                     |                                                                                                                                                                                                                                                                                                                                          |
| TECHNICAL<br>SUPPORT   | Bryan Koci, M.S.<br>Study Director, Eurofins Panlabs<br>Tel: (636) 362-7006<br>BryanKoci@eurofins.com                                                                                                                               |                                                                                                                                                                                                                                                                                                                                          |
| STUDY<br>APPROVAL      | I certify that this report accurately reflects all<br>relevant data collected in this study.<br><br><br><br>Jennifer Wesley, Associate Scientist | I certify that the results presented in this report<br>were generated using materials and methods<br>mentioned and that these results accurately reflect<br>the raw data.<br><br><br><br>Diane Werth, Senior Operations Manager<br>Quality statement |

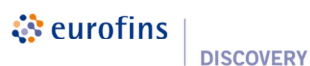

## TABLE OF CONTENTS

|                                                               |    |
|---------------------------------------------------------------|----|
| TABLE OF CONTENTS .....                                       | 3  |
| COMPOUND INFORMATION .....                                    | 4  |
| <b>Test compounds</b> .....                                   | 4  |
| <b>Reference compounds</b> .....                              | 4  |
| SUMMARY .....                                                 | 5  |
| <b>Ion Channels tested</b> .....                              | 5  |
| <b>Study objective</b> .....                                  | 5  |
| <b>Measurements</b> .....                                     | 5  |
| <b>Significant results</b> .....                              | 5  |
| EXPERIMENTAL RESULTS .....                                    | 6  |
| <b>Client Compound Data Tables</b> .....                      | 6  |
| <b>Estimated IC<sub>50</sub> Compound Summary Table</b> ..... | 7  |
| REFERENCE COMPOUND RESULTS .....                              | 7  |
| <b>Reference Compound Table</b> .....                         | 7  |
| DATA CALCULATION AND ANALYSIS .....                           | 8  |
| MATERIALS AND METHODS .....                                   | 9  |
| STORAGE AND RETENTION OF RECORDS .....                        | 10 |

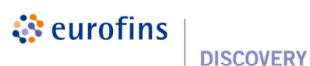

## COMPOUND INFORMATION

### Test compounds

| Eurofins<br>Compound I.D. | Client<br>Compound I.D. | Client Reference<br>I.D. | MW | MW + Salt | Weight<br>received<br>(mg) | Received<br>condition |
|---------------------------|-------------------------|--------------------------|----|-----------|----------------------------|-----------------------|
| US034-0009484-1           | KI-03066                |                          |    | 488.45    | 3.1                        | Dry Powder            |
| US034-0009484-2           | KI-Ref.B                |                          |    | 663.29    | 3.1                        | Dry Powder            |

### Reference compounds

In each experiment and if applicable, the respective reference compounds were tested concurrently with the test compounds, and the data were compared with historical values determined at Eurofins. The experiment was accepted in accordance with Eurofins Standard Operating Procedure on assay validation.

| Compound                    | Target         | Mode       | Concentration(s) (μM)                  |
|-----------------------------|----------------|------------|----------------------------------------|
| GABA (EC <sub>50</sub> )    | GABAA α1/β3/γ2 | Antagonist | 8                                      |
| Glycine (EC <sub>50</sub> ) | GlyRA1         | Antagonist | 30                                     |
| Bicuculline                 | GABAA α1/β3/γ2 | Antagonist | 0.032, 0.16, 0.8, 4, 20, 100           |
| Strychnine                  | GlyRA1         | Antagonist | 0.00001<br>0.0001, 0.001, 0.01, 0.1, 1 |

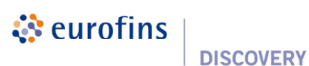

## SUMMARY

### **Ion Channels tested**

Ligand-Gated Ion Channels: GABAA  $\alpha 1/\beta 3/\gamma 2$ , GlyRA1

### **Study objective**

Electrophysiological assays conducted to profile two (2) compounds for activities on the ion channel targets specified above using the IonFlux HT electrophysiological platform.

### **Measurements**

Methods employed in this study have been developed and validated with reliability and reproducibility. Assays were performed under conditions described in the accompanying "Materials and Methods" section of this report

Where presented,  $IC_{50}$  values were determined by a non-linear, least squares regression analysis. Reference standards were run as an integral part of each assay to ensure the validity of the results obtained.

### **Significant results**

Results showing an inhibition greater than 25% are considered to represent significant effects of test compounds and listed in the following tables with individual calculation results and calculable  $IC_{50}$ .

## EXPERIMENTAL RESULTS

### Client Compound Data Tables

#### GABAA $\alpha 1\beta 3\gamma 2$

| Compound ID                  | Client Compound ID    | Concentration ( $\mu\text{M}$ ) | % inhibition |       |       |
|------------------------------|-----------------------|---------------------------------|--------------|-------|-------|
|                              |                       |                                 | n1           | n2    | mean  |
| US034-0009484-1              | KI-03066              | 0.3                             | 6.97         | 5.10  | 6.03  |
| US034-0009484-1              | KI-03066              | 1                               | 7.68         | 8.56  | 8.12  |
| US034-0009484-1              | KI-03066              | 3                               | 11.24        | 11.15 | 11.19 |
| US034-0009484-1              | KI-03066              | 10                              | 11.91        | 11.25 | 11.58 |
| US034-0009484-1              | KI-03066              | 30                              | 17.92        | 21.88 | 19.90 |
| US034-0009484-2              | KI-Ref.B              | 0.3                             | 8.47         | 7.29  | 7.88  |
| US034-0009484-2              | KI-Ref.B              | 1                               | 13.71        | 8.91  | 11.31 |
| US034-0009484-2              | KI-Ref.B              | 3                               | 14.83        | 14.80 | 14.82 |
| US034-0009484-2              | KI-Ref.B              | 10                              | 7.26         | 6.69  | 6.98  |
| US034-0009484-2              | KI-Ref.B              | 30                              | 7.53         | 9.75  | 8.64  |
| Time-Matched Vehicle Control | GABA EC <sub>80</sub> | 8                               | 10.18        | 6.23  | 8.20  |
| Time-Matched Vehicle Control | GABA EC <sub>80</sub> | 8                               | 8.99         | 11.66 | 10.33 |
| Time-Matched Vehicle Control | GABA EC <sub>80</sub> | 8                               | 10.63        | 14.04 | 12.34 |
| Positive Reference Control   | Bicuculline           | 0.032                           | 10.10        | 5.90  | 8.00  |
| Positive Reference Control   | Bicuculline           | 0.16                            | 23.88        | 22.01 | 22.94 |
| Positive Reference Control   | Bicuculline           | 0.8                             | 36.81        | 36.53 | 36.67 |
| Positive Reference Control   | Bicuculline           | 4                               | 82.09        | 82.02 | 82.06 |
| Positive Reference Control   | Bicuculline           | 20                              | 96.98        | 97.42 | 97.20 |
| Positive Reference Control   | Bicuculline           | 100                             | 98.90        | 99.03 | 98.97 |

#### GlyRA1

| Compound ID                  | Client Compound ID       | Concentration ( $\mu\text{M}$ ) | % inhibition |        |       |
|------------------------------|--------------------------|---------------------------------|--------------|--------|-------|
|                              |                          |                                 | n1           | n2     | mean  |
| US034-0009484-1              | KI-03066                 | 0.3                             | -1.49        | -10.64 | -6.07 |
| US034-0009484-1              | KI-03066                 | 1                               | -1.66        | -9.41  | -5.54 |
| US034-0009484-1              | KI-03066                 | 3                               | -8.75        | -2.91  | -5.83 |
| US034-0009484-1              | KI-03066                 | 10                              | 0.39         | 1.50   | 0.95  |
| US034-0009484-1              | KI-03066                 | 30                              | 4.13         | 8.74   | 6.43  |
| US034-0009484-2              | KI-Ref.B                 | 0.3                             | -8.14        | -2.00  | -5.07 |
| US034-0009484-2              | KI-Ref.B                 | 1                               | -13.15       | -3.04  | -8.10 |
| US034-0009484-2              | KI-Ref.B                 | 3                               | -0.52        | 7.84   | 3.66  |
| US034-0009484-2              | KI-Ref.B                 | 10                              | 6.33         | 1.52   | 3.93  |
| US034-0009484-2              | KI-Ref.B                 | 30                              | -2.53        | -1.99  | -2.26 |
| Time-Matched Vehicle Control | Glycine EC <sub>80</sub> | 30                              | -2.38        | 2.52   | 0.07  |
| Time-Matched Vehicle Control | Glycine EC <sub>80</sub> | 30                              | 2.58         | -2.29  | 0.15  |
| Time-Matched Vehicle Control | Glycine EC <sub>80</sub> | 30                              | 3.98         | -0.97  | 1.51  |
| Positive Reference Control   | Strychnine               | 0.00001                         | -0.97        | 4.95   | 1.99  |
| Positive Reference Control   | Strychnine               | 0.0001                          | 25.64        | 15.98  | 20.81 |
| Positive Reference Control   | Strychnine               | 0.001                           | 50.75        | 53.02  | 51.89 |
| Positive Reference Control   | Strychnine               | 0.01                            | 99.06        | 99.29  | 99.17 |
| Positive Reference Control   | Strychnine               | 0.1                             | 98.87        | 99.02  | 98.95 |
| Positive Reference Control   | Strychnine               | 1                               | 99.91        | 99.82  | 99.87 |

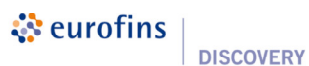

### Estimated IC<sub>50</sub> Compound Summary Table

| Compound | Target         | Mode       | Estimated IC <sub>50</sub> (μM) |
|----------|----------------|------------|---------------------------------|
| KI-03066 | GABAA α1/β3/γ2 | Antagonist | >30                             |
| KI-Ref.B | GABAA α1/β3/γ2 | Antagonist | >30                             |
| KI-03066 | GlyRA1         | Antagonist | >30                             |
| KI-Ref.B | GlyRA1         | Antagonist | >30                             |

## REFERENCE COMPOUND RESULTS

### Reference Compound Table

| ITEM       | Assay Name                                                                        | Mode       | Reference Compound | Estimated IC <sub>50</sub> (μM) |
|------------|-----------------------------------------------------------------------------------|------------|--------------------|---------------------------------|
| CYL8053IF2 | GABAA (alpha1/beta3/gamma2) Human Ion Channel Cell Based Antagonist IonFlux Assay | Antagonist | Bicuculline        | 1.0                             |
| CYL8056IF2 | GlyRA1 Human Glycine Ion Channel Cell Based Antagonist IonFlux Assay              | Antagonist | Strychnine         | 0.00071                         |

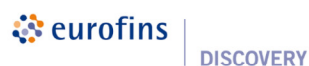

## DATA CALCULATION AND ANALYSIS

### CYL8053IF2 GABAA IonFlux HT Antagonist Assay

Peak inward currents in response to the GABA additions in the presence of a single concentration of compound were measured. All compound data have been normalized to the baseline peak current induced by addition of EC<sub>80</sub> GABA for 2 seconds:

$$\text{Normalized Peak Current} = \left( I_{\text{Compound} + \text{GABA}} / I_{\text{GABA}} \right)$$

Where  $I_{\text{(Compound} + \text{GABA)}}$  is the peak current induced by addition of test compound + EC<sub>80</sub> GABA after 30 seconds incubation of test compound,  $I_{\text{GABA}}$  is the baseline peak current induced by addition of EC<sub>80</sub> GABA.

All data were first exported to an Excel compatible data file and then analyzed using Graph Pad Prism software.

### CYL8056IF2 GlyRA1 IonFlux HT Antagonist Assay

Peak inward currents in response to the Glycine additions in the presence of a single concentration of compound were measured. All compound data have been normalized to the baseline peak current induced by addition of EC<sub>80</sub> Glycine for 2 seconds:

$$\text{Normalized Peak Current} = \left( I_{\text{Compound} + \text{Glycine}} / I_{\text{Glycine}} \right)$$

Where  $I_{\text{(Compound} + \text{Glycine)}}$  is the peak current induced by addition of test compound + EC<sub>80</sub> Glycine after 30 seconds incubation of test compound,  $I_{\text{Glycine}}$  is the baseline peak current induced by addition of EC<sub>80</sub> Glycine.

All data were first exported to an Excel compatible data file and then analyzed using Graph Pad Prism software.

## MATERIALS AND METHODS

### IonFlux Protocols

#### CYL8053IF2 GABAA IonFlux HT Antagonist Assay

All recordings were obtained from a holding potential of -60 mV.

The compound addition sequence that was used for all additions was the same for all assays. One addition of the EC<sub>80</sub> concentration of GABA was added to establish baseline response. Each test concentration of compound was applied for 30 seconds followed by the addition of EC<sub>80</sub> GABA in the presence of the compound for 2 seconds. The process was repeated with the next ascending concentration of test compound, up to three (3) concentrations per experimental pattern.

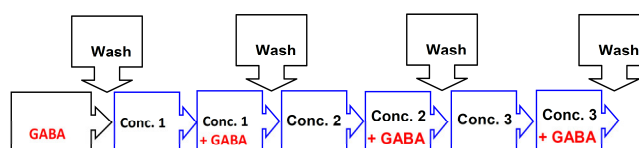

#### Key

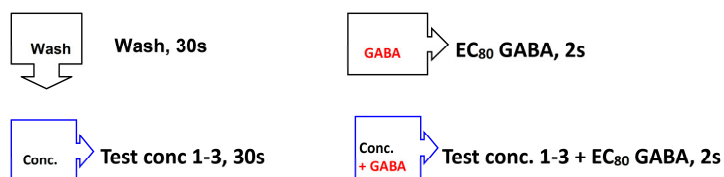



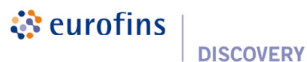

#### CYL8056IF2 GlyRA1 IonFlux HT Antagonist Assay

All recordings were obtained from a holding potential of -60 mV.

The compound addition sequence that was used for all additions was the same for all assays. One addition of the EC<sub>80</sub> concentration of Glycine was added to establish baseline response. Each test concentration of compound was applied for 30 seconds followed by the addition of EC<sub>80</sub> Glycine in the presence of the compound for 2 seconds. The process was repeated with the next ascending concentration of test compound, up to three (3) concentrations per experimental pattern.

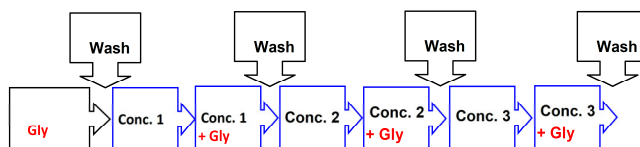

#### Key

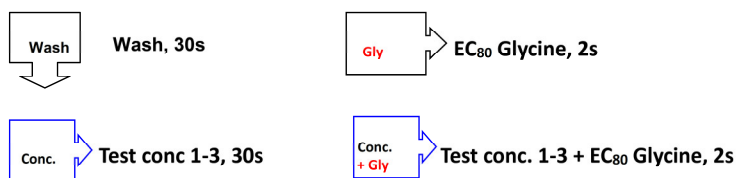

#### STORAGE AND RETENTION OF RECORDS

Documents generated during the performance of the study will be archived by Eurofins Discovery for a period of time after study completion (this period of time is dependent on each individual site policy). The access to the archives is restricted to authorized employees only.

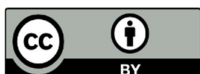

Supplement: s001 [file molecules-25-05536-s001.pdf]
